# Supplementary material
Source: PubMed Central journal article supplement (PMC1177366)

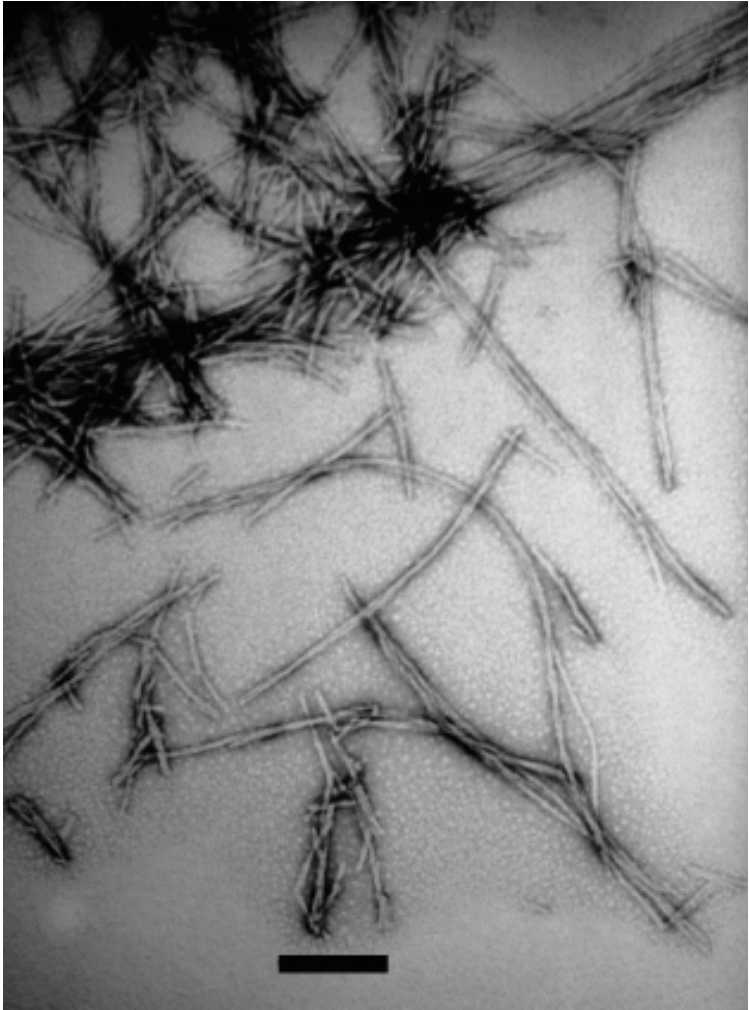

Supplement: pnas_0501215102_1.pdf [file pnas_0501215102_1.pdf]

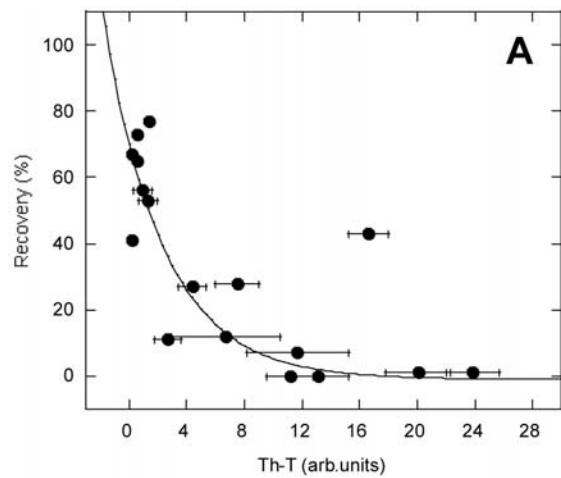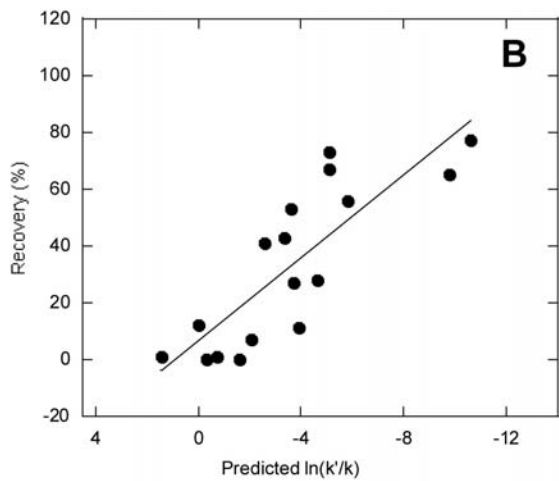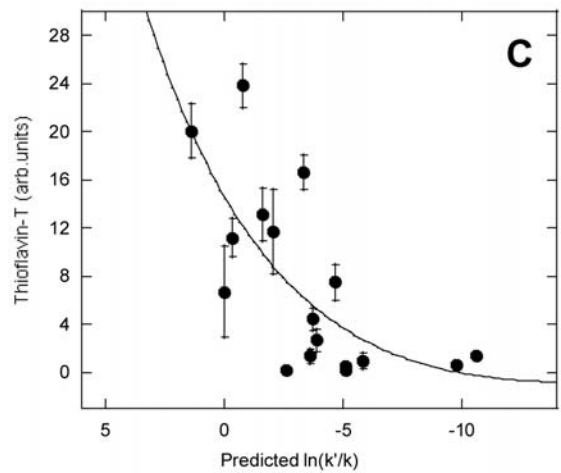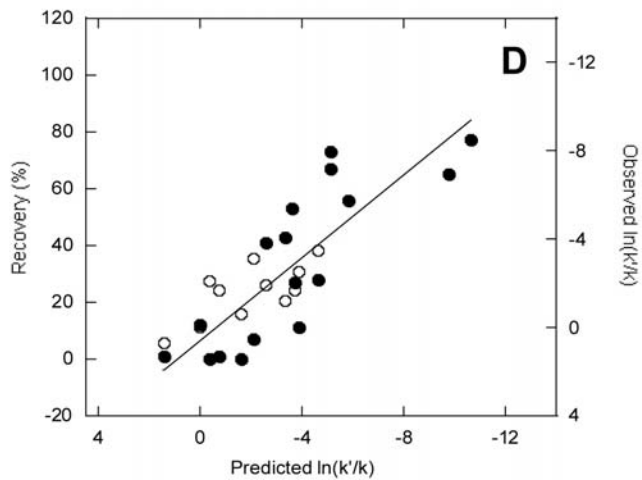

Supplement: pnas_0501215102_2.pdf [file pnas_0501215102_2.pdf]

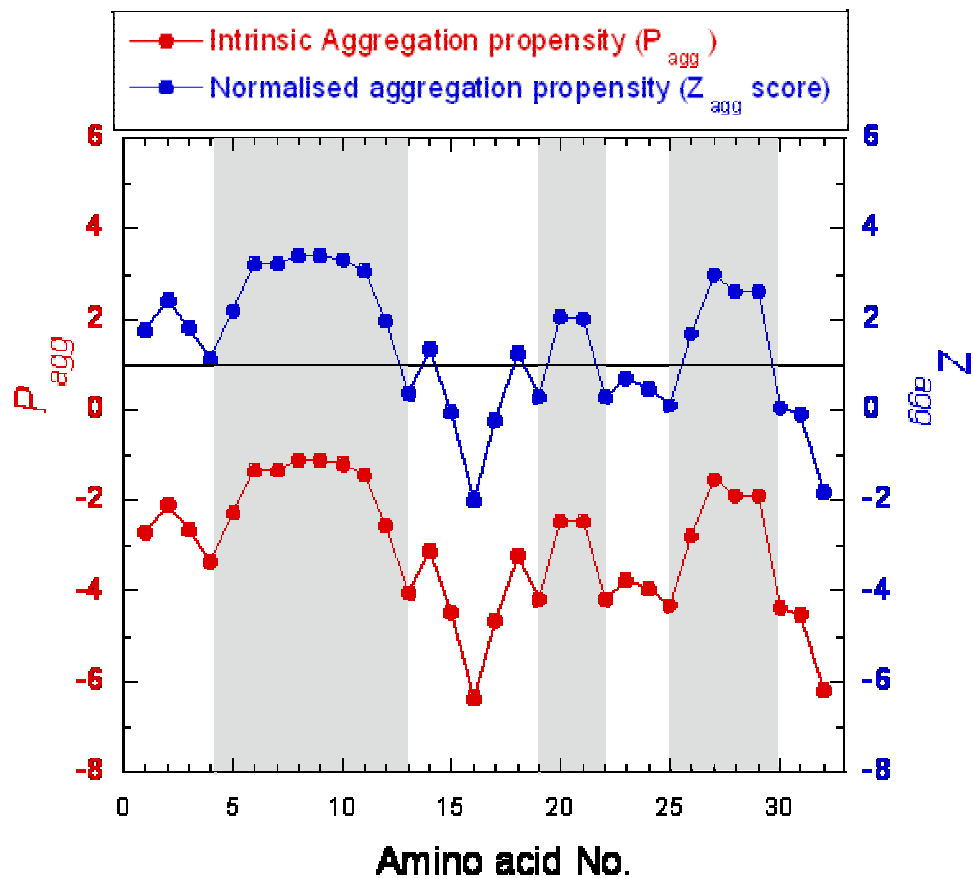

Supplement: pnas_0501215102_3.pdf [file pnas_0501215102_3.pdf]
